# Supplementary material for: A new example of viral intein in Mimivirus
Source: PubMed Central journal article supplement (PMC549080; doi:10.1186/1743-422x-2-8), 2005-02-11
Supplement: 1743-422X-2-8-S1.pdf [file 1743-422X-2-8-S1.pdf]

E.cuniculi -----  
S.pombe -----  
Soybean -----  
Mimivirus\_PolB **DSYIQIMVNDGYSSSPLSEGAKYKVYDIQTITEKKLNEKTNKEEIFVYQAIKTKICQKDI**  
=====

E.cuniculi -----KEDVPYSSIGE-LQSKNKDTRRRRIASYCLRDTVLPRLRFNT  
S.pombe -----KEDVHYSIITD-LQNGTADSRRLAIYCLKDAYLPQRLMDK  
Soybean -----KEDVHHSIISD-LQNGNAETRRLAVYCLKDAYLPQRLLDK  
Mimivirus\_PolB **QQLRETIKNPLLGISWTF**AKDDMHHTKINEYFEEGDPKKIRQIAKYCLKDKLVNLLAK  
\*:\*: : \* : : . . \*:\* \* \*:\* \* \* \* : .  
=====>

E.cuniculi LNVLYNTELSRVGTGPIEYFFTRGMAIKIFTLVYRAASKEDFMIPDID-----PFESN  
S.pombe LMCVNYTEMARVTGVFPNLLARGQQIKVISQLFRKALQHDLVVPNIR-----VNGTD  
Soybean LMFYINYVEMARVTGVPISFLLSRGQSIVKLSQLLRARQKNLVIPNAK-----QAGSE  
Mimivirus\_PolB LEIIVNSVGMMAKCHVPLSYLFLRGQGVKIFSLVSKKCREKNFLIPVLRKRKSKDNEGED  
\* : \* . : : \* . \* : : : \* \* : \* : : : : . : : : : \* :

E.cuniculi K-TFEGGFVIEPRKGFYNKPVSV**M****FSS**LYPSIMISHNLCYTTLLTKEQYRILG-----  
S.pombe E-QYEGATVIEPIKGYDTPAI**T****M****FSS**LYPSIMQAHNLCYTTLLDSNTAELLKQ---  
Soybean QGTFEGATVLEARAGFYEKPIAT**L****M****FAS**LYPSIMMAYNLCYCTLVIPEDARKLNIPP---  
Mimivirus\_PolB E-TYEGATVITPKPNVYLSPIGV**L****M****FSS**LYPSNSMRERNLSQECYVDDS--KYDNL**P****GYIY**  
: : \* . \* : . . \* . \* : : : \* : \* \* \* . \* \* \* . : . . .  
(intein insertion site, I) <==  
Polymerase active site

E.cuniculi -----  
S.pombe -----DVD-----  
Soybean -----E-S-----  
Mimivirus\_PolB **HDVEIILKDKKGIILRNIDGTPQKEYHRFAQEIIITDEQINRELKDIFDKINTVFENVAI**  
=**(i3:197aa)**=====

E.cuniculi -----  
S.pombe -----  
Soybean -----  
Mimivirus\_PolB **IQNQKYFTEKNISELIDKHKNISDSKIEDIEFDESLSDKRKNKLVDAAEKDSLDKNIGFYQ**  
=====

E.cuniculi -----  
S.pombe -----  
Soybean -----  
Mimivirus\_PolB **KIKSQIDKIKLDSKIEIDNLSKNLNEEEKSKQINKMELNTKNLISKVFSKYLITEQOREE**  
=====

E.cuniculi -----GTKTPTGNYFCSAERKKGLLPRILTDLLTSRKRIKEELEREKDSAL  
S.pombe -----YSVTPNGDYFVKPHVRKGLLPILADLLNARKKAKADLKKETDPFK  
Soybean -----VNRTPSGETFVKSNLQKGILPEILEELLTARKRAKADLKEAKDPLE  
Mimivirus\_PolB **LIVLEKERAKRSVN**AEKAKVYNTVDGITVRYGILPEILTELLNKRKETNGKLANEKDPFV  
: : . : \* : \* \* \* \* : \* : \* \* . \* . . \* .  
=====>

E.cuniculi RACLNGRQLAFKL**CANS**LYGFTGASRGKLPFCFEISQSVTGFGREMIILTKKLI EENFSRK  
S.pombe KAVLDGRQLALK**V****SANS**VYGFTGATNGRLPCLAISSSVTSYGRQMI EKT KD VVEKRYRIE  
Soybean KAVLDGRQLALK**I****SANS**VYGFTGATIGQLPCL EISSSVTSYGRQMI EHTK KLV EDKFTTL  
Mimivirus\_PolB KAILNALQLAFKV**TANS**LYGQTGAPTSPLYFIAIAACTTAIGRERLHYAKKTVEDNFP--  
: \* \* : . \* \* \* : \* : \* \* \* \* \* \* . \* : \* : . \* . \* \* : : \* . : \* . :  
(intein insertion site, II)

E.cuniculi NGYTHDSVVIYGTTSVMVDFDEQ-----DIEKVFKMSKEISEFITSKFVKPVS  
S.pombe NGYSHDAVVIYGTTSVMVKFGVK-----TLPEAMKLGEEAANYVSDQFPNPIK  
Soybean NGYEHNAEVIYGTTSVMVQFGVS-----AVEEAMNLRGEEAAEHISGFTFKPIK  
Mimivirus\_PoLB -----GSEVIYGTTSIFINFHIKDENGEEKTDKEALMKTIAKCQRAAKLINQNVPK PQS  
.: \*\*\*\*\*: : \* . : : : . : : . : \* .

(intein insertion site, III)  
Polymerase active site

E.cuniculi LEFEKVYYYPYLLINKKRYAGLLYSNPENPSKIDTRGIETVRRDNCRLVKEVETVLEMIL  
S.pombe LEFEKVYFPYLLISKKRYAGLFWTRTDTYDKMDSKGIETVRRDNCPLVSYVIDTALRKML  
Soybean LEFEKVYYYPYLLISKKRYAGLFWTKPDNFDKMDTKGIETVRRDNCLLVKNLNVNDCCLHKIL  
Mimivirus\_PoLB IVYEKTLHPFILVAKKKYVGLLFEKSPDKYFLKSMGIVLKRDNAPIVKIVVGGIIDNIL  
: : \*\* . \* : : \* : \* : \* : \* : \* : \* : \* : \* : \* : \* : \* : \*

E.cuniculi YQKNVEKAQFVKDAVRDLYLGRITDLSLLVISKSLTKAGDKYESKQAHVQLAEKLRKRDE  
S.pombe IDQDVEGAQLFTKKYISDLLQNKIDMSQLVITKALSKT--DYAAKMAHVELAERMRKRDA  
Soybean IDRDI PGAVQYVKNAISDLLMNRMDLSLLVITKGLTKTGDDYEVKAAHVELAERMRKRDA  
Mimivirus\_PoLB KNRDIDKAI EYTKIVLDKLMNGEYPMDFKFIISKTL-KSRYKKPSTIAHKVLADRMAVRDP  
: : : \* : \* : \* : \* : \* : \* : \* : \* : \* : \* : \* : \* : \*

E.cuniculi STAPVLGDRVPYVIVRKEKGA-AAH-----EKSEDPVYVLENNLPIDTEYYISQQISKPL  
S.pombe GSAPAI GDRVAVYVIKGAQGDQFY-----MRSEDPYVLENNIPIDAKYYLENQLSKPL  
Soybean ATAPNVGDRVPYVVIKAKGAKAY-----ERSEDPYVLENNIPIDPHYLENQISKPI  
Mimivirus\_PoLB GNKPQINDRIPFVYIVKDMGKKKKDDILQGDLEHPEYVIANNLKDYLKYLEHQIINPA  
.. \* : \* : \* : \* : \* : \* : \* : \* : \* : \* : \* : \* : \*

E.cuniculi SRIFEPIMDNV--QELFRGDHTR-IAASTGLKGPMNTFLKPTDT CVG--CRAEGRI-IC  
S.pombe LRIFEPILGEK-ASSLLHGDHTRTISMAAPSVGGIMKFAVKVETCLGCKAPIKKGKTALC  
Soybean LRIFEPILKNA-SKELLHGSHTRSISISTPNSNGILRFACKQLPALVVKLYLARVITLSV  
Mimivirus\_PoLB SQILELMMDTKDVQKFFN---KYI IDEQNKRKGAQSLTK-----  
: \* \* : : . : : . : \* :

E.cuniculi INCVK-----DFHVHLQKMQREVEDKKEKLNCSWVECQRQC  
S.pombe ENCLNRS AEL-----YQRQVAQVNDLEVR FARLWTQCQRQC  
Soybean HIAKEGRLSCTVKQYLKCLSWRCFLGGCGHSVRS AKVHFIRMFSAPVGIVQFS IDEKRHR  
Mimivirus\_PoLB -----WMDFSKLPKESGSKTAKKPYQS QKLQKTSSNKS QIDPKYINLIKNSRKH  
. : . : . : . : . : . : . : . : . : . : . : . : . : . : . : . : .

E.cuniculi GSIHNQVLCVNRDCPIFYMR TKVKKELVPLNDRLRKLSRFDW  
S.pombe GSMHQDVICTSRDCPIFYMR IAEHKKLQOSVDLLKRFDEM SW  
Soybean KIWVKQSCNWTGDGTSKFCQEFDLADLFEPMDTNTI WCLPQS-  
Mimivirus\_PoLB CQNMNKWISSTDKCTDDWEPIVE-----  
: . : . : . : . : . : . : . : . : . : . : . : . : .
