# Supplementary material for: A new example of viral intein in Mimivirus
Source: PubMed Central journal article supplement (PMC549080; doi:10.1186/1743-422x-2-8), 2005-02-11
Supplement: 1743-422X-2-8-S2.pdf [file 1743-422X-2-8-S2.pdf]

Mja\_RFC-3 CLTGDAKITLPDEREIKIEDFIKMFEEERKLKHVNLNRNGEDLVLAGVKFNSKIVNHHKVYRL  
Pab\_RFC-2 CVTGDTKVYTPDEREVKIRDFMNYFENGLIKEVSNRIGRDTVIAAASFNSRIVGHPVYRL  
Mimivirus\_i3 -----

Mja\_RFC-3 VLESGREIEATGDHKFLTRDGWKEVYELKEDEVLVYPALEGVGFVDEERRIIGLNEFYE  
Pab\_RFC-2 TLESGRIIEATGDHMFLTPPEGWKQTYDIKEGSEVLVKPTLEGTPYEPDPRIIDIKEFYN  
Mimivirus\_i3 -----

Mja\_RFC-3 FLTNYEIKLGYKPLGKAKSYKELITRDKEKILSRVLELSKYSKS-----  
Pab\_RFC-2 FLEKIEREHNKLPKEAKTFRELITKDKKILRRALELRAEIENGLTKREAEILELISAD  
Mimivirus\_i3 -----YIYHDVEIILKDKK-----  
\*:\* :\*:

Mja\_RFC-3 -----EIRR  
Pab\_RFC-2 TWIPRAELEKKARISRTRLNQILQRLEKKGYIERRIEGRKQFVRKIRNGKILRNAMDIKR  
Mimivirus\_i3 -----GKILRNIDGTPQ-----

Mja\_RFC-3 KIEEEFGIKISLTTIKNLINGKIDGFALKYVRKIKELGWDEITYDDEKAGIFARLLGFII  
Pab\_RFC-2 ILEEEFGIKISYTTVKLLSGNVDGMAYRILKEVKEKWL--VRYDDEKAGILARVVGFI  
Mimivirus\_i3 -----KEYHRFAQEII  
\* . \* :

Mja\_RFC-3 GDGHLSSKSEGRILITATINELEGIKKDLEKLGK---ASNIEKDIEHKLDGREIKGK  
Pab\_RFC-2 GDGHLARN--GRIWFNSSKEELEMLANDLRKLGK---PSEIIERDSSSEIQGRKVKGR  
Mimivirus\_i3 TDEQINRE--LKDIFDKINTVFENNVAIIQNQKYFTEKNISELIDK-----  
\* :: :. : : \* :. : \* :\*:

Mja\_RFC-3 TSFIYINNKA FYLLLNFVWGVEIGNKTINGYNI PKWIKYGNK FVKREFLRGLFGADGTPKY  
Pab\_RFC-2 IYMLYVDNAAFHALLRFWKVEVGNKTKKGYTVPEWIKGNL FVKREFLRGLFGADGTPKC  
Mimivirus\_i3 -----HKNISDSKIEDIEFDESLSDKR-----  
:\*. . . : . . \*\*

Mja\_RFC-3 IKKYNINGIKLGIRVENISKDKTLEFFEEVKKMLEEFEVESYIKVSKIDNKNLTEL-IVK  
Pab\_RFC-2 GKRYNFNGIKLEIRAKKESLERTVEFLNDVADLLREFDVDSKITVSPKTEGFIIIRL-IVT  
Mimivirus\_i3 -----NKLVDAEKDSLKNIGFYQKIKSQIDKIKLDSKIEIDNL-SKNLNEEEEKSK  
: : . : \* : : \* : : . : : : \* \* . . : . .

Mja\_RFC-3 ANNKNYLKYLSRISYAYEKDNFARLVGEYLRRIKAYKDIILKEIAENALKEADGEKSLRE  
Pab\_RFC-2 PNDANYLNFLTRVGYAYAKDTYARLVGEYIRIKLAYKNIILPGIAEKAIELATVTNS-TY  
Mimivirus\_i3 QINKMELNTKNLISKVFSK-----  
: \* : . : . : \*

Mja\_RFC-3 LARKYNVPVDFIINQLKGDIGLPRNFMTFEFLKEKVVGDGKYVUSERI IKKECIGYRDVY  
Pab\_RFC-2 AAKVLGVSRDFVNRLKGTQIGITRDFMTFEFEMKERVNLG-YVIEKVIKKEKLGYLVDVY  
Mimivirus\_i3 -----YLITEQQREELIVLEKERAKRSVN-----  
: : \* : : \* \* : \* . :

Mja\_RFC-3 DITCHKDPSFIANGFVSHN  
Pab\_RFC-2 DVTCARDHSFISNGLVSHN  
Mimivirus\_i3 -----
